# Supplementary material
Source: PubMed Central journal article supplement (PMC5387109)
Supplement: NIHMS854167-supplement.pdf [file NIHMS854167-supplement.pdf]

## **Supplemental Material**

### **Acute effect of ozone exposure on daily mortality in seven cities of Jiangsu Province, China: No clear evidence for threshold**

Kai Chen, Lian Zhou, Xiaodong Chen, Jun Bi<sup>\*</sup>, and Patrick L. Kinney<sup>\*</sup>

**\* Corresponding authors.**

Email address: (1) [jbi@nju.edu.cn](mailto:jbi@nju.edu.cn) (J. Bi); (2) [plk3@cumc.columbia.edu](mailto:plk3@cumc.columbia.edu) (P.L. Kinney).

#### **Table of Contents.**

**Table S1.** Spearman correlation coefficients between air pollutant concentrations, temperature, and relative humidity (RH) by season in seven Jiangsu cities during 2013-2014.

**Fig. S1.** Locations of seven study cities, air quality monitoring sites (red points), and weather stations (blue points) in Jiangsu Province, China.

**Fig. S2.** Monthly variations of the daily maximum 8-h average (MDA8) ozone concentrations in seven Jiangsu cities during January 18, 2013 to December 31, 2014. The lower and upper “hinges” are the 25<sup>th</sup> and 75<sup>th</sup> percentiles. The middle hinge is the median value. The upper whisker extends from the upper hinge to the highest value that is within 1.5× IQR of the upper hinge, while the lower whisker extends from the lower hinge to the lowest value that is within 1.5× IQR of the lower hinge. IQR is the inter-quantile range (75<sup>th</sup> percentile – 25<sup>th</sup> percentile). Points correspond to data beyond the end of the whiskers, i.e., outliers.

**Fig. S3.** Number of days with MDA8 ozone concentration exceeding the Chinese Ambient Air Quality Standard (CAAQS) level 2 standard (160 µg/m<sup>3</sup>) in seven Jiangsu cities during January 18, 2013 to December 31, 2014.

**Fig. S4.** Per cent increase (posterior mean and 95% posterior intervals) of daily total non-accidental mortality associated with a 10 µg/m<sup>3</sup> increase of ozone concentration at varying lag days in seven Jiangsu cities, 2013-2014.

**Fig. S5.** Concentration-response curve for ozone (lag01) and daily total mortality based on natural cubic spline models with 3df in seven Jiangsu cities, 2013-2014. Linearity p-value represents the significance of spline models departure from linear models.

**Table S1.** Spearman correlation coefficients between air pollutant concentrations, temperature, and relative humidity (RH) by season in seven Jiangsu cities during 2013-2014.

|                                | PM <sub>2.5</sub> | PM <sub>10</sub> | NO <sub>2</sub> | SO <sub>2</sub> | Temperature | RH     |
|--------------------------------|-------------------|------------------|-----------------|-----------------|-------------|--------|
| <i>Full year</i>               |                   |                  |                 |                 |             |        |
| O <sub>3</sub>                 | -0.053            | -0.003           | -0.136          | -0.037          | 0.396       | -0.119 |
| PM <sub>2.5</sub>              |                   | 0.893            | 0.639           | 0.617           | -0.321      | -0.166 |
| PM <sub>10</sub>               |                   |                  | 0.637           | 0.682           | -0.272      | -0.371 |
| NO <sub>2</sub>                |                   |                  |                 | 0.627           | -0.293      | -0.32  |
| SO <sub>2</sub>                |                   |                  |                 |                 | -0.366      | -0.552 |
| Temperature                    |                   |                  |                 |                 |             | 0.143  |
| <i>Warm season (Apr.-Sep.)</i> |                   |                  |                 |                 |             |        |
| O <sub>3</sub>                 | 0.306             | 0.37             | 0.195           | 0.338           | 0.085       | -0.426 |
| PM <sub>2.5</sub>              |                   | 0.873            | 0.563           | 0.493           | -0.103      | -0.202 |
| PM <sub>10</sub>               |                   |                  | 0.557           | 0.607           | -0.07       | -0.433 |
| NO <sub>2</sub>                |                   |                  |                 | 0.585           | -0.133      | -0.34  |
| SO <sub>2</sub>                |                   |                  |                 |                 | -0.007      | -0.616 |
| Temperature                    |                   |                  |                 |                 |             | -0.122 |
| <i>Cold season(Oct.-Mar.)</i>  |                   |                  |                 |                 |             |        |
| O <sub>3</sub>                 | -0.108            | -0.105           | -0.179          | -0.134          | 0.327       | 0.073  |
| PM <sub>2.5</sub>              |                   | 0.897            | 0.606           | 0.632           | -0.092      | -0.06  |
| PM <sub>10</sub>               |                   |                  | 0.623           | 0.676           | -0.046      | -0.259 |
| NO <sub>2</sub>                |                   |                  |                 | 0.565           | 0.079       | -0.258 |
| SO <sub>2</sub>                |                   |                  |                 |                 | -0.274      | -0.474 |
| Temperature                    |                   |                  |                 |                 |             | 0.134  |

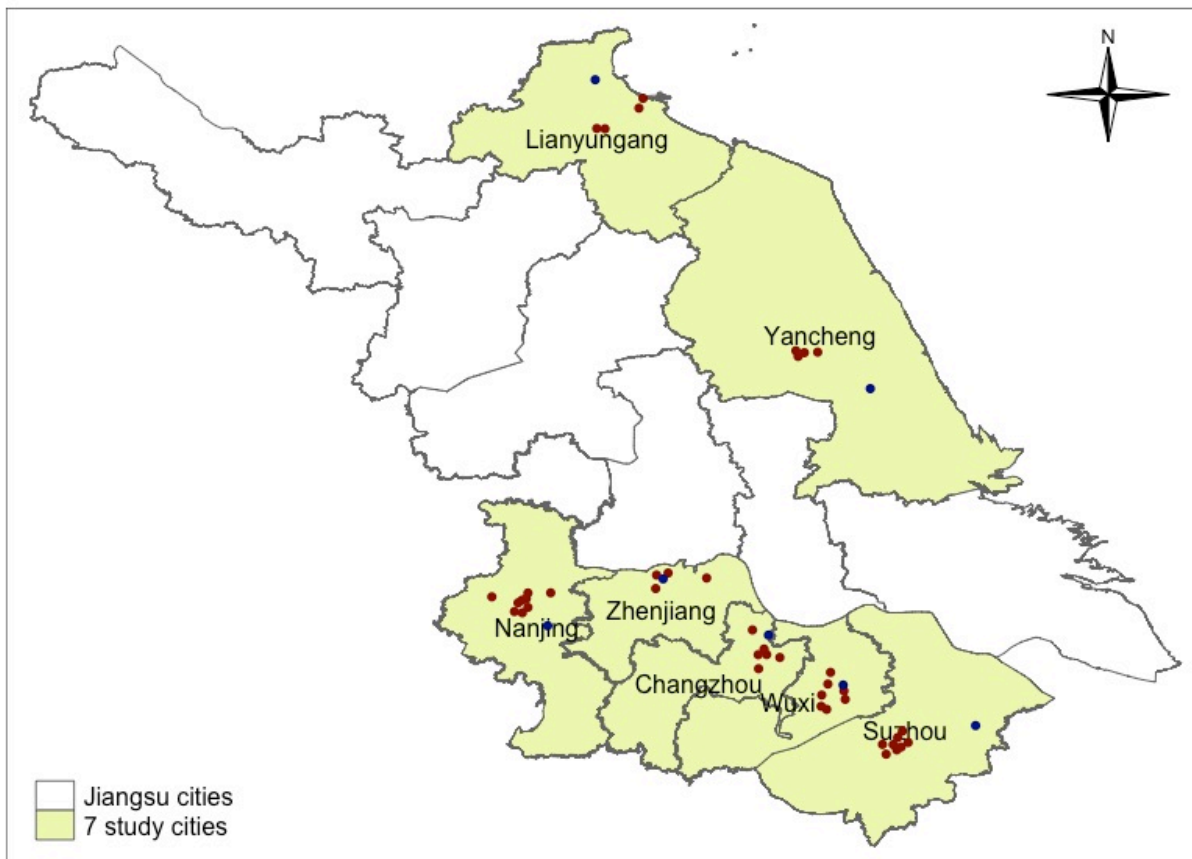

**Fig. S1.** Locations of seven study cities, air quality monitoring sites (red points), and weather stations (blue points) in Jiangsu Province, China.

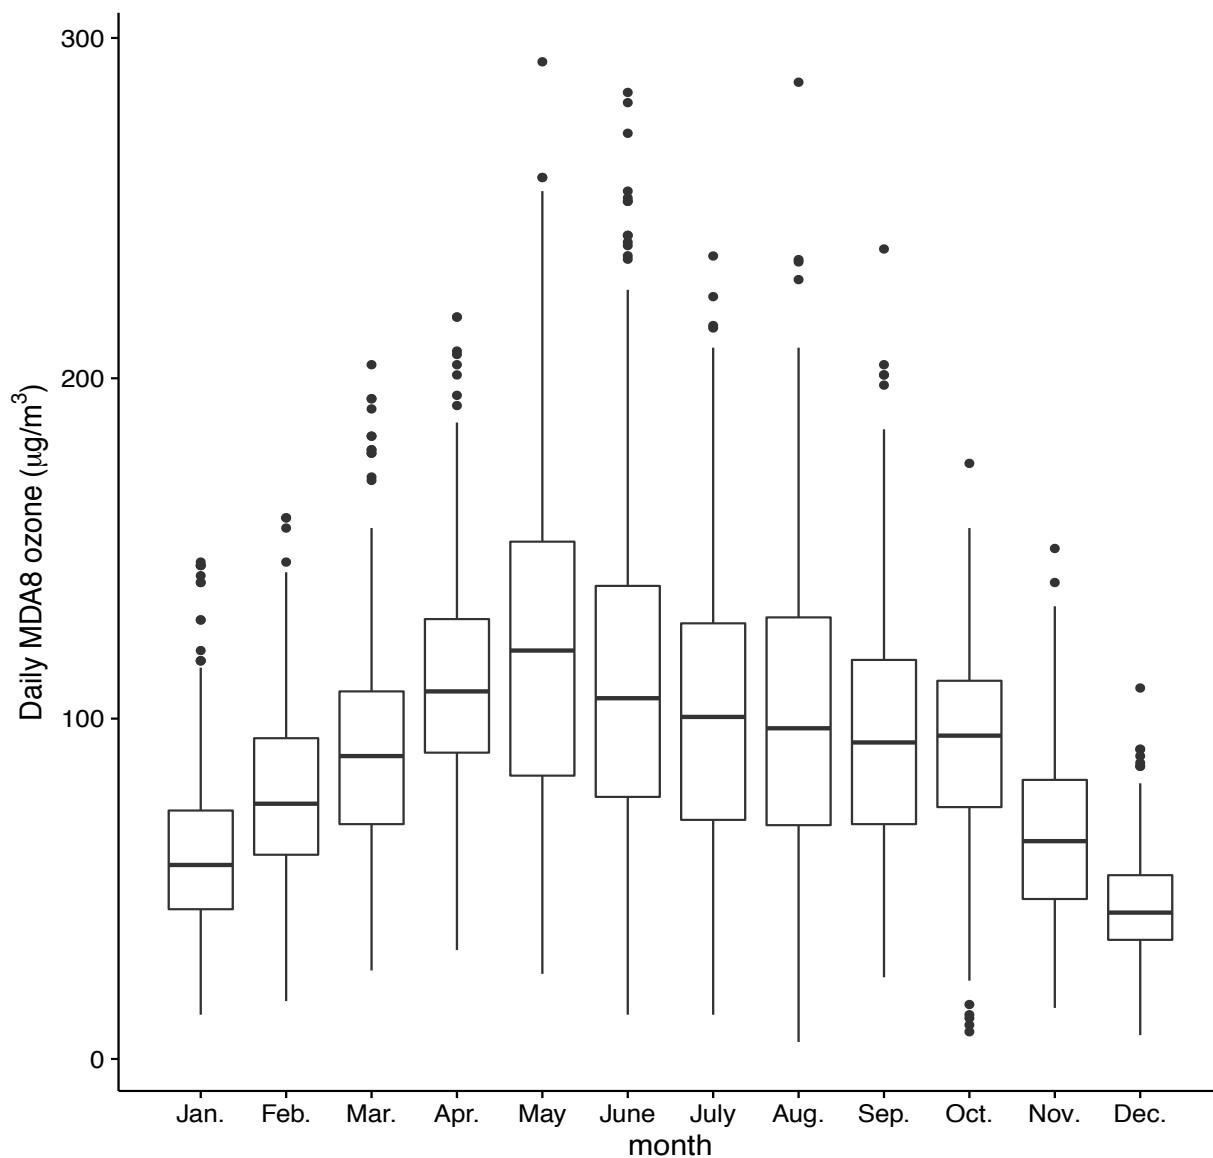

**Fig. S2.** Monthly variations of the daily maximum 8-h average (MDA8) ozone concentrations in seven Jiangsu cities during January 18, 2013 to December 31, 2014. The lower and upper “hinges” are the 25<sup>th</sup> and 75<sup>th</sup> percentiles. The middle hinge is the median value. The upper whisker extends from the upper hinge to the highest value that is within 1.5× IQR of the upper hinge, while the lower whisker extends from the lower hinge to the lowest value that is within 1.5× IQR of the lower hinge. IQR is the inter-quantile range (75<sup>th</sup> percentile – 25<sup>th</sup> percentile). Points correspond to data beyond the end of the whiskers, i.e., outliers.

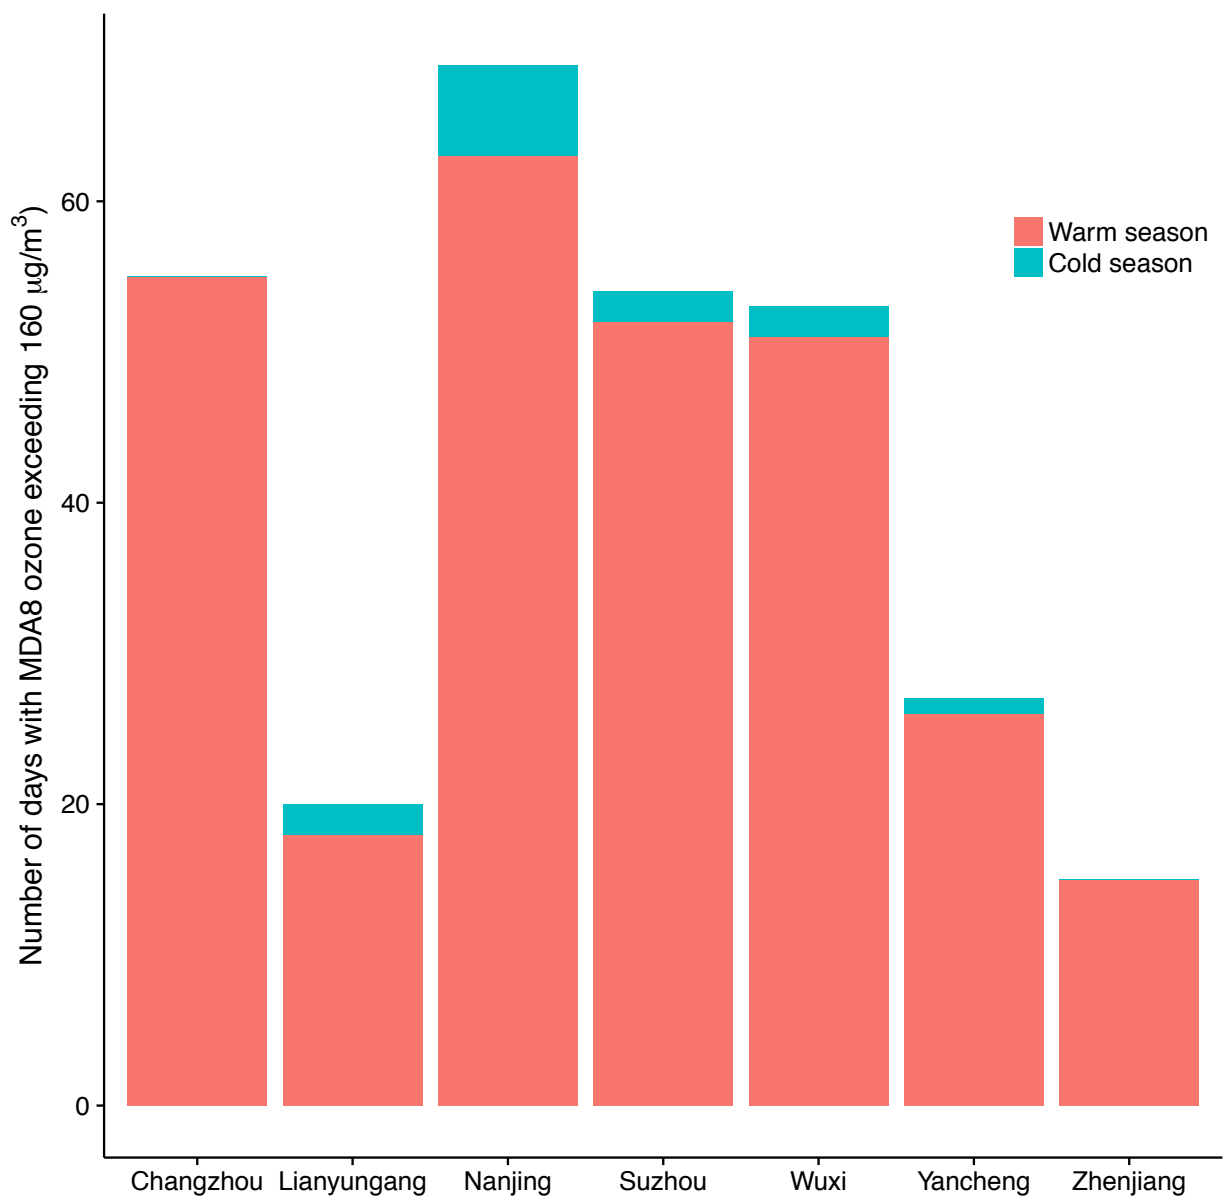

**Fig. S3.** Number of days with MDA8 ozone concentration exceeding the Chinese Ambient Air Quality Standard (CAAQS) level 2 standard ( $160 \mu\text{g}/\text{m}^3$ ) in seven Jiangsu cities during January 18, 2013 to December 31, 2014.

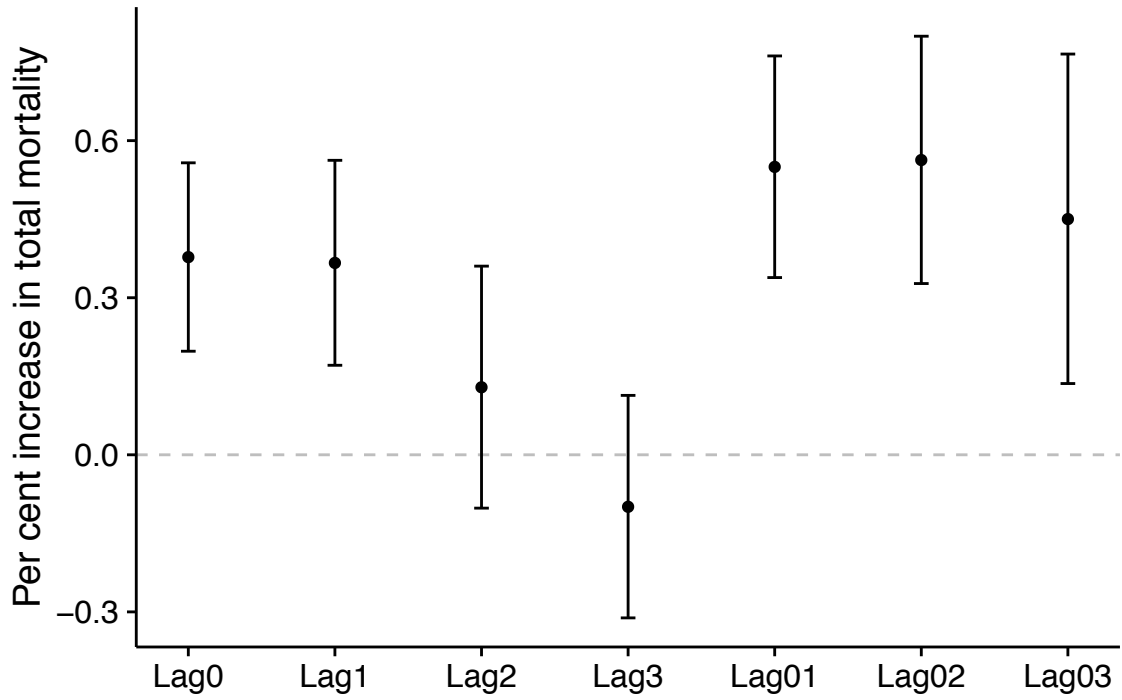

**Fig. S4.** Per cent increase (posterior mean and 95% posterior intervals) of daily total non-accidental mortality associated with a  $10 \mu\text{g}/\text{m}^3$  increase of ozone concentration at varying lag days in seven Jiangsu cities, 2013-2014.

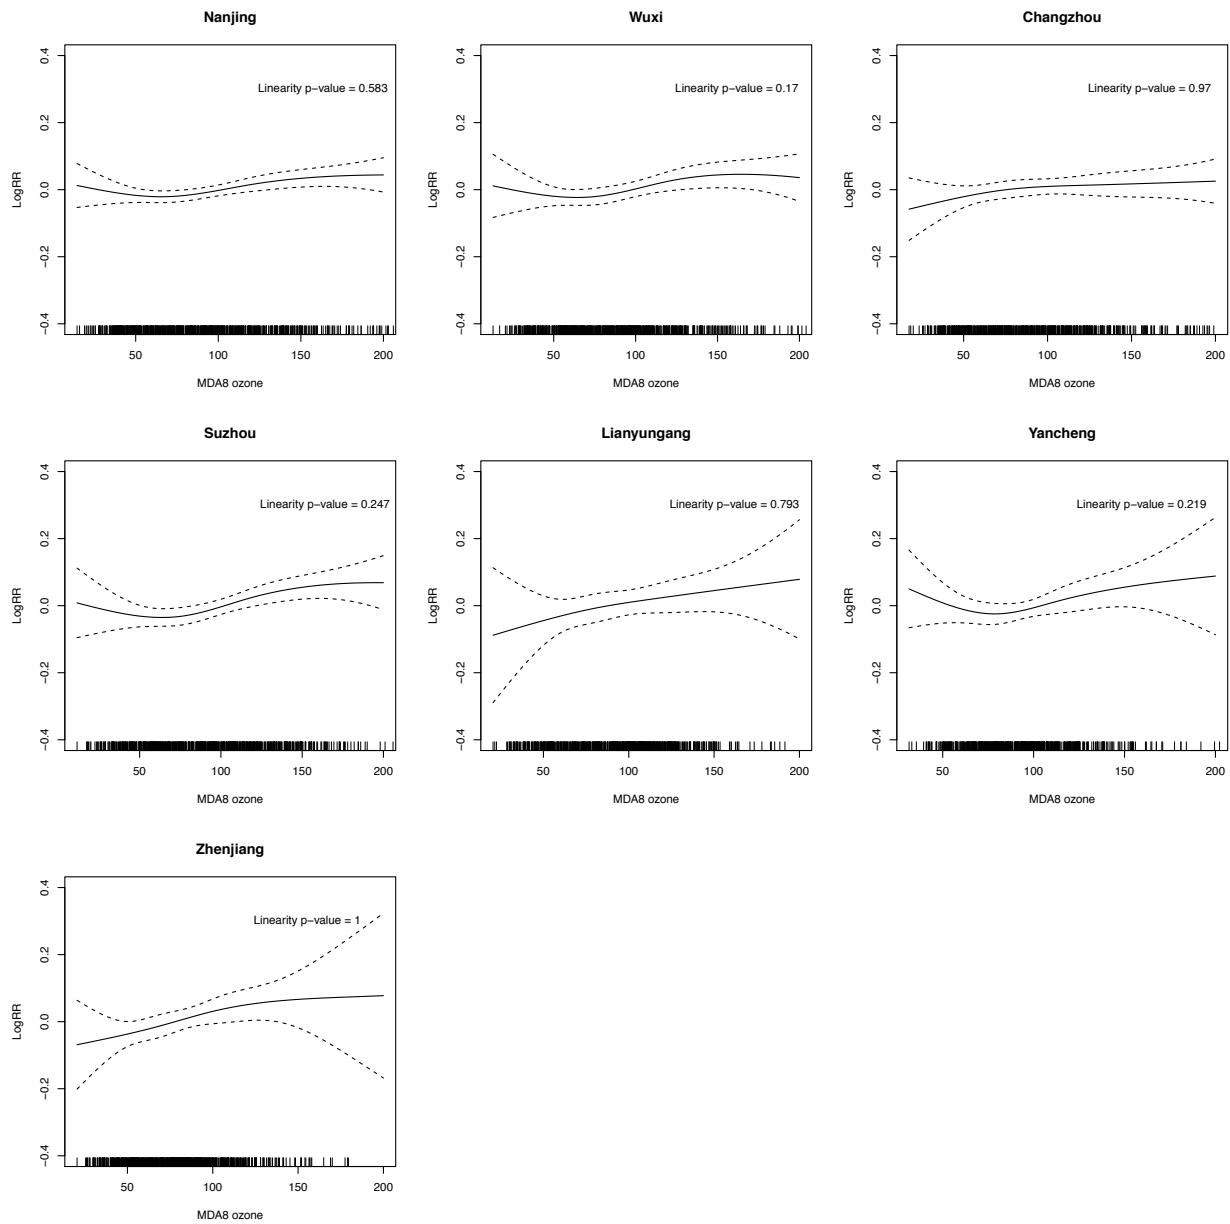

**Fig. S5.** Concentration-response curve for ozone (lag01) and daily total mortality based on natural cubic spline models with 3df in seven Jiangsu cities, 2013-2014. Linearity p-value represents the significance of spline models departure from linear models.
